# Supplementary material for: Fe3O4–SiO2–graphene oxide–amino acid ionic liquid magnetic solid-phase extraction combined with inductively coupled plasma optical emission spectrometry for speciation of Cr(iii) and Cr(vi) in environmental water
Source: Royal Society of Chemistry journal article supplement (doi:10.1039/d1nj04917h), 2022-01-01
Supplement: d1nj04917h1.pdf [file d1nj04917h1.pdf]

## Supplementary Information

### **Fe<sub>3</sub>O<sub>4</sub>-SiO<sub>2</sub>-Graphene Oxide-Amino Acid Ionic Liquid magnetic solid-phase extraction combined with ICP-OES for speciation of Cr(III) and Cr(VI) in environmental waters**

Jinshun Cang<sup>1,2</sup>, Weixi Gu<sup>1</sup>, Yuheng Zhang<sup>1</sup>, Xiashi Zhu<sup>\*,1</sup>

1. College of Chemistry and Chemical Engineering, Yangzhou University, Yangzhou University, Yangzhou 225002, P. R. China.
2. Jiangsu R&D Center of the Ecological Dyes and Chemicals, Yancheng Polytechnic College, Yancheng, 224005, P. R. China

E-mail:

[xszhu@yzu.edu.cn](mailto:xszhu@yzu.edu.cn)

**Fig. S1** SEM images of (a)  $\text{Fe}_3\text{O}_4\text{-SiO}_2\text{-GO}$  and (b)  $\text{Fe}_3\text{O}_4\text{-SiO}_2\text{-GO-AAIL}$ .

**Fig. S2** FT-IR spectra (a) IL, (b) GO, (c)  $\text{Fe}_3\text{O}_4$ , (d)  $\text{Fe}_3\text{O}_4\text{-SiO}_2$ , (e)  $\text{Fe}_3\text{O}_4\text{-SiO}_2\text{-GO}$ , (f)  $\text{Fe}_3\text{O}_4\text{-SiO}_2\text{-GO-AAIL}$ .

**Fig. S3** Magnetic hysteresis loops of  $\text{Fe}_3\text{O}_4$ ,  $\text{Fe}_3\text{O}_4\text{-SiO}_2$ ,  $\text{Fe}_3\text{O}_4\text{-SiO}_2\text{-GO}$  and  $\text{Fe}_3\text{O}_4\text{-SiO}_2\text{-GO-AAIL}$ .

**Fig. S4** TGA spectra of  $\text{Fe}_3\text{O}_4\text{-SiO}_2\text{-GO}$  and  $\text{Fe}_3\text{O}_4\text{-SiO}_2\text{-GO -AAIL}$ .

**Fig. S5** Zeta potential plots of  $\text{Fe}_3\text{O}_4\text{-SiO}_2\text{-GO-AAIL}$ .

**Table S1** Existent forms of Cr(III) and Cr(VI) under different pH.

**Table S2** The determination results of Cr(III) and Cr(VI) in certified sample.

**Table S3** The determination results of Cr(III) and Cr(VI) in certified sample and environmental samples by FAAS.

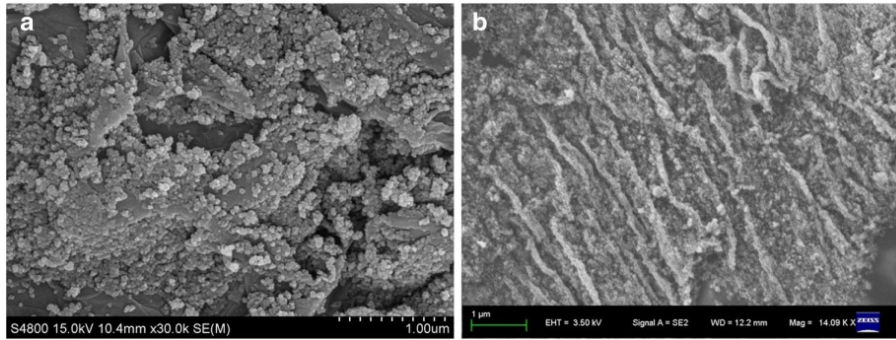

**Fig. S1** SEM images of (a)  $\text{Fe}_3\text{O}_4\text{-SiO}_2\text{-GO}$  and (b)  $\text{Fe}_3\text{O}_4\text{-SiO}_2\text{-GO-AAIL}$ .

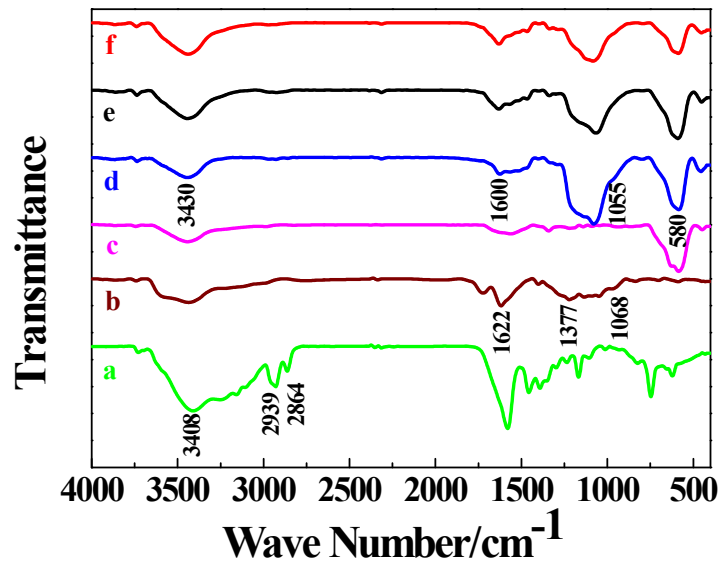

**Fig. S2** FT-IR spectra (a) IL, (b) GO, (c)  $\text{Fe}_3\text{O}_4$ , (d)  $\text{Fe}_3\text{O}_4\text{-SiO}_2$ , (e)  $\text{Fe}_3\text{O}_4\text{-SiO}_2\text{-GO}$ , (f)  $\text{Fe}_3\text{O}_4\text{-SiO}_2\text{-GO-AAIL}$ .

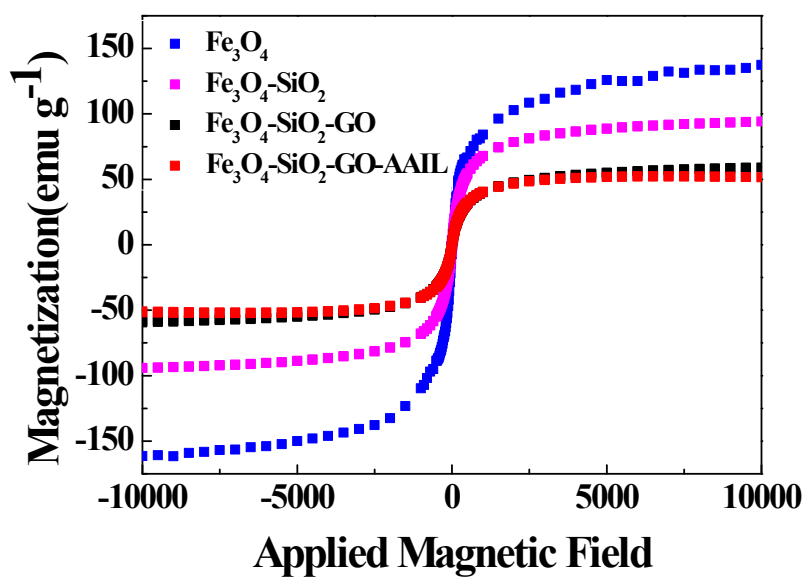

**Fig. S3** Magnetic hysteresis loops of  $\text{Fe}_3\text{O}_4$ ,  $\text{Fe}_3\text{O}_4\text{-SiO}_2$ ,  $\text{Fe}_3\text{O}_4\text{-SiO}_2\text{-GO}$  and  $\text{Fe}_3\text{O}_4\text{-SiO}_2\text{-GO-AAIL}$ .

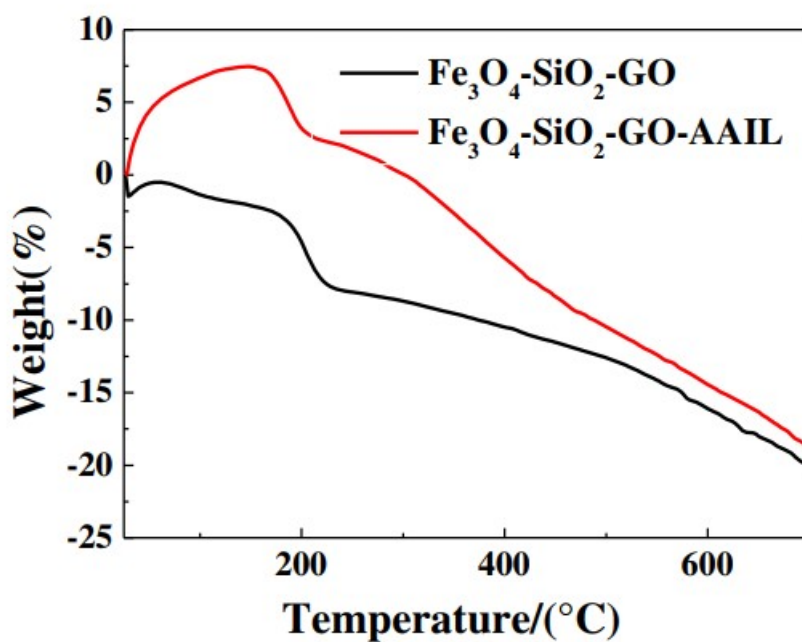

**Fig. S4** TGA spectra of  $\text{Fe}_3\text{O}_4\text{-SiO}_2\text{-GO}$  and  $\text{Fe}_3\text{O}_4\text{-SiO}_2\text{-GO -AAIL}$ .

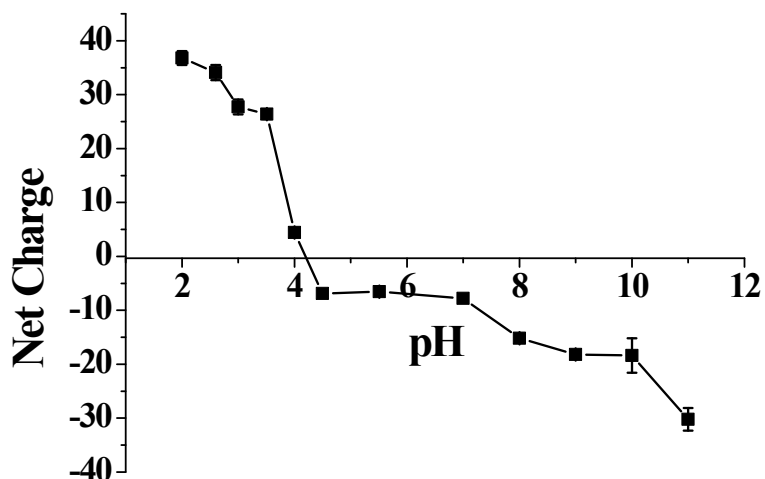

Fig. S5 Zeta potential plots of Fe<sub>3</sub>O<sub>4</sub>-SiO<sub>2</sub>-GO-AAIL.

Table S1 Existent forms of Cr(III) and Cr(VI) under different pH

| pH      | 3.0                                             | 4.0                  | 6.0                              | 6.5                 | 7.0                 | 9.0                              | >9.0 |
|---------|-------------------------------------------------|----------------------|----------------------------------|---------------------|---------------------|----------------------------------|------|
| Cr(III) | Cr(H <sub>2</sub> O) <sub>6</sub> <sup>3+</sup> | Cr(OH) <sup>2+</sup> | Cr(OH) <sub>2</sub> <sup>+</sup> | Cr(OH) <sub>3</sub> | Cr(OH) <sub>3</sub> | Cr(OH) <sub>4</sub> <sup>-</sup> |      |
| Cr(VI)  | HCrO <sub>4</sub> <sup>-</sup>                  |                      |                                  |                     |                     | CrO <sub>4</sub> <sup>2-</sup>   |      |

Table S2 The determination results of Cr(III) and Cr(VI) in certified sample.

| Samples          | Certified value (μg·L <sup>-1</sup> ) | Added (μg·L <sup>-1</sup> ) |        | Found (μg·L <sup>-1</sup> ) |               | Recovery (%) |        |
|------------------|---------------------------------------|-----------------------------|--------|-----------------------------|---------------|--------------|--------|
|                  |                                       | Cr(III)                     | Cr(VI) | Cr(III)                     | Cr(VI)        | Cr(III)      | Cr(VI) |
| GSB 07-1187-2000 | 60.30                                 | 0.00                        | 0.00   | 52.64 ± 2.59                | 7.36 ± 2.93   | -            | -      |
|                  |                                       | 50.00                       | 50.00  | 103.93 ± 3.33               | 59.46 ± 2.46  | 102.6        | 104.2  |
|                  |                                       | 100.00                      | 100.00 | 150.55 ± 3.98               | 119.17 ± 4.50 | 97.9         | 111.8  |
|                  |                                       | 150.00                      | 150.00 | 201.63 ± 1.85               | 166.68 ± 2.59 | 99.3         | 106.2  |

**Table S3** The determination results of Cr(III) and Cr(VI) in certified sample and environmental samples by FAAS.

| Samples                                    | Total Cr ( $\mu\text{g} \cdot \text{L}^{-1}$ ) |
|--------------------------------------------|------------------------------------------------|
| GSB 07-1187-2000                           | 60.34                                          |
| Lake water                                 | 14.63                                          |
| Water Sample Near Pesticide Chemical Plant | 34.80                                          |
| Water Sample Near<br>Chemical Plant        | 29.66                                          |
